# Supplementary material for: Systematic analysis of dark and camouflaged genes reveals disease-relevant genes hiding in plain sight
Source: Genome Biol. 2019 May 20;20:97. doi: 10.1186/s13059-019-1707-2 (PMC6526621; doi:10.1186/s13059-019-1707-2)
Supplement: Supplementary file 12 — Gene Ontology results for dark genes in IlluminaRL100 for hg38. (CSV 47 kb) [file 13059_2019_1707_MOESM12_ESM.csv]

_MEMBER_Input ID	_LogP_Input ID	GO	_PATTERN_	_RANK_	GiniIndex	Category	CategoryID	Description	LogP	Enrichment	Z-score	#TotalGeneInLibrary	#GeneInGO	#GeneInHitList	#GeneInGOAndHitList	%InGO	STDV %InGO	GeneID	Hits	Log(q-value)	EvidenceCutoff	GROUP_ID	FirstInGroupByEnrichment	FirstInGroupByLogP	BestLogPInGroup	BestEnrichmentInGroup	URL
1	-10.696115590140193	R-HSA-5689880	M1	1	0	Reactome Gene Sets	6	Ub-specific processing proteases	-10.696115590140193	5.432502343017807	9.454479838114883	24152	220	485	24	4.948453608247423	0.9847896501668795	8337|8517|392188|645402|645836|723790|728369|728373|728379|728386|728393|728400|728405|728419|100287144|100287178|100287205|100287238|100287327|100287364|100287404|100287441|100287478|100287513	HIST2H2AA3|IKBKG|USP17L8|USP17L4|USP17L3|HIST2H2AA4|USP17L24|USP17L25|USP17L26|USP17L5|USP17L27|USP17L28|USP17L29|USP17L30|USP17L10|USP17L11|USP17L12|USP17L13|USP17L17|USP17L18|USP17L19|USP17L20|USP17L21|USP17L22	-6.379893552713378	0	1	1	1	-10.696115590140193	5.432502343017807
1	-9.400702925542534	R-HSA-5688426	M1	1	0	Reactome Gene Sets	6	Deubiquitination	-9.400702925542534	4.359415460446388	8.339097539262704	24152	297	485	26	5.360824742268041	1.0227757181857078	3607|8337|8517|221937|392188|645402|645836|723790|728369|728373|728379|728386|728393|728400|728405|728419|100287144|100287178|100287205|100287238|100287327|100287364|100287404|100287441|100287478|100287513	FOXK2|HIST2H2AA3|IKBKG|FOXK1|USP17L8|USP17L4|USP17L3|HIST2H2AA4|USP17L24|USP17L25|USP17L26|USP17L5|USP17L27|USP17L28|USP17L29|USP17L30|USP17L10|USP17L11|USP17L12|USP17L13|USP17L17|USP17L18|USP17L19|USP17L20|USP17L21|USP17L22	-5.561602142835381	0	1	0	0	-10.696115590140193	5.432502343017807
1	-5.874853261739943	GO:0016579	M1	1	0	GO Biological Processes	19	protein deubiquitination	-5.874853261739943	3.5192889147936315	6.102684302991371	24152	283	485	20	4.123711340206185	0.9028775747897915	3607|8517|221937|392188|645402|645836|728369|728386|100287144|100287178|100287205|100287238|100287327|100287364|100287404|100287441|100287478|100287513|100288520|101241878	FOXK2|IKBKG|FOXK1|USP17L8|USP17L4|USP17L3|USP17L24|USP17L5|USP17L10|USP17L11|USP17L12|USP17L13|USP17L17|USP17L18|USP17L19|USP17L20|USP17L21|USP17L22|USP17L15|USP17L23	-2.8139037294164337	0	1	0	0	-10.696115590140193	5.432502343017807
1	-5.508992446523133	GO:0070646	M1	1	0	GO Biological Processes	19	protein modification by small protein removal	-5.508992446523133	3.330965762162534	5.805863318728026	24152	299	485	20	4.123711340206185	0.9028775747897915	3607|8517|221937|392188|645402|645836|728369|728386|100287144|100287178|100287205|100287238|100287327|100287364|100287404|100287441|100287478|100287513|100288520|101241878	FOXK2|IKBKG|FOXK1|USP17L8|USP17L4|USP17L3|USP17L24|USP17L5|USP17L10|USP17L11|USP17L12|USP17L13|USP17L17|USP17L18|USP17L19|USP17L20|USP17L21|USP17L22|USP17L15|USP17L23	-2.514989703830237	0	1	0	0	-10.696115590140193	5.432502343017807
1	-2.1748538749006485	GO:0006511	M1	1	0	GO Biological Processes	19	ubiquitin-dependent protein catabolic process	-2.1748538749006485	1.7872016952288055	2.8261100948233846	24152	613	485	22	4.536082474226804	0.9449073518208754	3303|3304|7332|89853|116988|127544|392188|645836|728369|728386|100287144|100287178|100287205|100287238|100287327|100287364|100287404|100287441|100287478|100287513|100288520|101241878	HSPA1A|HSPA1B|UBE2L3|MVB12B|AGAP3|RNF19B|USP17L8|USP17L3|USP17L24|USP17L5|USP17L10|USP17L11|USP17L12|USP17L13|USP17L17|USP17L18|USP17L19|USP17L20|USP17L21|USP17L22|USP17L15|USP17L23	0.0	0	1	0	0	-10.696115590140193	5.432502343017807
1	-2.1277662210105497	GO:0019941	M1	1	0	GO Biological Processes	19	modification-dependent protein catabolic process	-2.1277662210105497	1.7698782539180256	2.777765327275895	24152	619	485	22	4.536082474226804	0.9449073518208754	3303|3304|7332|89853|116988|127544|392188|645836|728369|728386|100287144|100287178|100287205|100287238|100287327|100287364|100287404|100287441|100287478|100287513|100288520|101241878	HSPA1A|HSPA1B|UBE2L3|MVB12B|AGAP3|RNF19B|USP17L8|USP17L3|USP17L24|USP17L5|USP17L10|USP17L11|USP17L12|USP17L13|USP17L17|USP17L18|USP17L19|USP17L20|USP17L21|USP17L22|USP17L15|USP17L23	0.0	0	1	0	0	-10.696115590140193	5.432502343017807
1	-2.0437878707748824	GO:0043632	M1	1	0	GO Biological Processes	19	modification-dependent macromolecule catabolic process	-2.0437878707748824	1.7389756177385043	2.6904819575846672	24152	630	485	22	4.536082474226804	0.9449073518208754	3303|3304|7332|89853|116988|127544|392188|645836|728369|728386|100287144|100287178|100287205|100287238|100287327|100287364|100287404|100287441|100287478|100287513|100288520|101241878	HSPA1A|HSPA1B|UBE2L3|MVB12B|AGAP3|RNF19B|USP17L8|USP17L3|USP17L24|USP17L5|USP17L10|USP17L11|USP17L12|USP17L13|USP17L17|USP17L18|USP17L19|USP17L20|USP17L21|USP17L22|USP17L15|USP17L23	0.0	0	1	0	0	-10.696115590140193	5.432502343017807
1	-9.426865471703174	R-HSA-1461973	M1	1	0	Reactome Gene Sets	6	Defensins	-9.426865471703174	11.491831879460745	10.842047266166265	24152	52	485	12	2.4742268041237114	0.7053563581829596	1667|1673|55894|245908|245910|245940|414325|503614|503618|504180|728358|100133267	DEFA1|DEFB4A|DEFB103B|DEFB105A|DEFB107A|DEFB130A|DEFB103A|DEFB107B|DEFB104B|DEFB105B|DEFA1B|DEFB130B	-5.561602142835381	0	2	1	1	-9.426865471703174	11.856651939126163
1	-8.094486297911246	R-HSA-1461957	M1	1	0	Reactome Gene Sets	6	Beta defensins	-8.094486297911246	11.856651939126163	10.080655600519465	24152	42	485	10	2.0618556701030926	0.6452591874443847	1673|55894|245908|245910|245940|414325|503614|503618|504180|100133267	DEFB4A|DEFB103B|DEFB105A|DEFB107A|DEFB130A|DEFB103A|DEFB107B|DEFB104B|DEFB105B|DEFB130B	-4.681354247476373	0	2	0	0	-9.426865471703174	11.856651939126163
1	-6.603748705194719	GO:0050829	M1	1	0	GO Biological Processes	19	defense response to Gram-negative bacterium	-6.603748705194719	6.639725085910653	7.673264182059654	24152	90	485	12	2.4742268041237114	0.7053563581829596	1667|1673|1755|55894|245910|389852|414325|503614|503618|646627|728358|729201	DEFA1|DEFB4A|DMBT1|DEFB103B|DEFB107A|SPACA5|DEFB103A|DEFB107B|DEFB104B|LYPD8|DEFA1B|SPACA5B	-3.4336547034461415	0	2	0	0	-9.426865471703174	11.856651939126163
1	-6.243446999315346	R-HSA-6803157	M1	1	0	Reactome Gene Sets	6	Antimicrobial peptides	-6.243446999315346	6.160569667339781	7.290337847160866	24152	97	485	12	2.4742268041237114	0.7053563581829596	1667|1673|55894|245908|245910|245940|414325|503614|503618|504180|728358|100133267	DEFA1|DEFB4A|DEFB103B|DEFB105A|DEFB107A|DEFB130A|DEFB103A|DEFB107B|DEFB104B|DEFB105B|DEFA1B|DEFB130B	-3.1088164195481194	0	2	0	0	-9.426865471703174	11.856651939126163
1	-6.194589535596661	GO:0050830	M1	1	0	GO Biological Processes	19	defense response to Gram-positive bacterium	-6.194589535596661	6.0977067115506	7.238707911668812	24152	98	485	12	2.4742268041237114	0.7053563581829596	1667|1673|1755|54145|55894|245910|389852|414325|503614|503618|728358|729201	DEFA1|DEFB4A|DMBT1|H2BFS|DEFB103B|DEFB107A|SPACA5|DEFB103A|DEFB107B|DEFB104B|DEFA1B|SPACA5B	-3.1088164195481194	0	2	0	0	-9.426865471703174	11.856651939126163
1	-3.9272110792627197	GO:0042742	M1	1	0	GO Biological Processes	19	defense response to bacterium	-3.9272110792627197	2.7495794067421415	4.552853882135087	24152	326	485	18	3.711340206185567	0.8583849309460603	1667|1673|1755|10407|54145|55894|245908|245910|245940|389852|414325|503614|503618|504180|646627|728358|729201|100133267	DEFA1|DEFB4A|DMBT1|SPAG11B|H2BFS|DEFB103B|DEFB105A|DEFB107A|DEFB130A|SPACA5|DEFB103A|DEFB107B|DEFB104B|DEFB105B|LYPD8|DEFA1B|SPACA5B|DEFB130B	-1.179190765902899	0	2	0	0	-9.426865471703174	11.856651939126163
1	-2.4635770438995976	GO:0019730	M1	1	0	GO Biological Processes	19	antimicrobial humoral response	-2.4635770438995976	3.2388902858100748	3.5635621862624425	24152	123	485	8	1.6494845360824741	0.5783511122298188	1667|1673|1755|10407|54145|55894|414325|728358	DEFA1|DEFB4A|DMBT1|SPAG11B|H2BFS|DEFB103B|DEFB103A|DEFA1B	-0.10639639879387561	0	2	0	0	-9.426865471703174	11.856651939126163
1	-2.151358009669195	GO:0031640	M1	1	0	GO Biological Processes	19	killing of cells of other organism	-2.151358009669195	4.149828178694157	3.4969778762440367	24152	60	485	5	1.0309278350515463	0.45866226665571014	1667|1673|55894|414325|728358	DEFA1|DEFB4A|DEFB103B|DEFB103A|DEFA1B	0.0	0	2	0	0	-9.426865471703174	11.856651939126163
1	-2.151358009669195	GO:0044364	M1	1	0	GO Biological Processes	19	disruption of cells of other organism	-2.151358009669195	4.149828178694157	3.4969778762440367	24152	60	485	5	1.0309278350515463	0.45866226665571014	1667|1673|55894|414325|728358	DEFA1|DEFB4A|DEFB103B|DEFB103A|DEFA1B	0.0	0	2	0	0	-9.426865471703174	11.856651939126163
1	-8.868393462421556	GO:0043628	M1	1	0	GO Biological Processes	19	ncRNA 3'-end processing	-8.868393462421556	11.908202599731062	10.60074427857775	24152	46	485	11	2.268041237113402	0.6760407976740604	11044|345630|441519|441521|541465|541466|728911|101060211|102723631|102723680|102723737	TENT4A|FBLL1|CT45A3|CT45A5|CT45A6|CT45A1|CT45A2|CT45A7|CT45A10|CT45A9|CT45A8	-5.154231416322703	0	3	1	1	-8.868393462421556	16.006480117820324
1	-8.6149327197511	GO:0034472	M1	1	0	GO Biological Processes	19	snRNA 3'-end processing	-8.6149327197511	16.006480117820324	11.373654090283678	24152	28	485	9	1.8556701030927836	0.6127906401161416	441519|441521|541465|541466|728911|101060211|102723631|102723680|102723737	CT45A3|CT45A5|CT45A6|CT45A1|CT45A2|CT45A7|CT45A10|CT45A9|CT45A8	-5.076861932707927	0	3	0	0	-8.868393462421556	16.006480117820324
1	-7.542417195582688	GO:0016180	M1	1	0	GO Biological Processes	19	snRNA processing	-7.542417195582688	12.449484536082474	9.841275064156484	24152	36	485	9	1.8556701030927836	0.6127906401161416	441519|441521|541465|541466|728911|101060211|102723631|102723680|102723737	CT45A3|CT45A5|CT45A6|CT45A1|CT45A2|CT45A7|CT45A10|CT45A9|CT45A8	-4.2675878433140975	0	3	0	0	-8.868393462421556	16.006480117820324
1	-4.474996226196806	GO:0016073	M1	1	0	GO Biological Processes	19	snRNA metabolic process	-4.474996226196806	4.9797938144329885	5.708891616236752	24152	100	485	10	2.0618556701030926	0.6452591874443847	8812|441519|441521|541465|541466|728911|101060211|102723631|102723680|102723737	CCNK|CT45A3|CT45A5|CT45A6|CT45A1|CT45A2|CT45A7|CT45A10|CT45A9|CT45A8	-1.635895443489653	0	3	0	0	-8.868393462421556	16.006480117820324
1	-4.332866851826303	GO:0031123	M1	1	0	GO Biological Processes	19	RNA 3'-end processing	-4.332866851826303	4.037670660351073	5.306358136897548	24152	148	485	12	2.4742268041237114	0.7053563581829596	7307|11044|345630|441519|441521|541465|541466|728911|101060211|102723631|102723680|102723737	U2AF1|TENT4A|FBLL1|CT45A3|CT45A5|CT45A6|CT45A1|CT45A2|CT45A7|CT45A10|CT45A9|CT45A8	-1.5521938408982785	0	3	0	0	-8.868393462421556	16.006480117820324
1	-8.764217040657035	GO:0007506	M1	1	0	GO Biological Processes	19	gonadal mesoderm development	-8.764217040657035	37.348453608247425	14.7195029289519	24152	8	485	6	1.2371134020618557	0.5019156922605331	7258|64591|728137|728395|728403|100289087	TSPY1|TSPY2|TSPY3|TSPY4|TSPY8|TSPY10	-5.146965007566239	0	4	1	1	-8.764217040657035	37.348453608247425
1	-5.846328515194214	GO:0006334	M1	1	0	GO Biological Processes	19	nucleosome assembly	-5.846328515194214	4.808076786349093	6.5839659275012	24152	145	485	14	2.88659793814433	0.7602595136929813	7258|8370|54145|64591|83740|126961|333932|474381|474382|554313|728137|728395|728403|100289087	TSPY1|HIST2H4A|H2BFS|TSPY2|H2AFB3|HIST2H3C|HIST2H3A|H2AFB2|H2AFB1|HIST2H4B|TSPY3|TSPY4|TSPY8|TSPY10	-2.8088600787202274	0	4	0	0	-8.764217040657035	37.348453608247425
1	-5.531258221813233	hsa05322	M1	1	0	KEGG Pathway	24	Systemic lupus erythematosus	-5.531258221813233	4.867467638167583	6.402386241704201	24152	133	485	13	2.6804123711340204	0.7333816978282389	720|721|3123|3127|8337|8370|83740|126961|333932|474381|474382|554313|723790	C4A|C4B|HLA-DRB1|HLA-DRB5|HIST2H2AA3|HIST2H4A|H2AFB3|HIST2H3C|HIST2H3A|H2AFB2|H2AFB1|HIST2H4B|HIST2H2AA4	-2.5160661800503985	0	4	0	0	-8.764217040657035	37.348453608247425
1	-5.214520512902824	GO:0031497	M1	1	0	GO Biological Processes	19	chromatin assembly	-5.214520512902824	4.251043500125722	5.980183458493109	24152	164	485	14	2.88659793814433	0.7602595136929813	7258|8370|54145|64591|83740|126961|333932|474381|474382|554313|728137|728395|728403|100289087	TSPY1|HIST2H4A|H2BFS|TSPY2|H2AFB3|HIST2H3C|HIST2H3A|H2AFB2|H2AFB1|HIST2H4B|TSPY3|TSPY4|TSPY8|TSPY10	-2.260026311493601	0	4	0	0	-8.764217040657035	37.348453608247425
1	-4.752388972280186	GO:0034728	M1	1	0	GO Biological Processes	19	nucleosome organization	-4.752388972280186	3.873172966781214	5.538762108728547	24152	180	485	14	2.88659793814433	0.7602595136929813	7258|8370|54145|64591|83740|126961|333932|474381|474382|554313|728137|728395|728403|100289087	TSPY1|HIST2H4A|H2BFS|TSPY2|H2AFB3|HIST2H3C|HIST2H3A|H2AFB2|H2AFB1|HIST2H4B|TSPY3|TSPY4|TSPY8|TSPY10	-1.834106943525408	0	4	0	0	-8.764217040657035	37.348453608247425
1	-4.683412395666711	GO:0006323	M1	1	0	GO Biological Processes	19	DNA packaging	-4.683412395666711	3.608546242342746	5.395641854628368	24152	207	485	15	3.0927835051546393	0.7861075196071474	7258|8370|11044|54145|64591|83740|126961|333932|474381|474382|554313|728137|728395|728403|100289087	TSPY1|HIST2H4A|TENT4A|H2BFS|TSPY2|H2AFB3|HIST2H3C|HIST2H3A|H2AFB2|H2AFB1|HIST2H4B|TSPY3|TSPY4|TSPY8|TSPY10	-1.7851759469893578	0	4	0	0	-8.764217040657035	37.348453608247425
1	-4.490469447146587	GO:0006333	M1	1	0	GO Biological Processes	19	chromatin assembly or disassembly	-4.490469447146587	3.6693217580032553	5.287897374064917	24152	190	485	14	2.88659793814433	0.7602595136929813	7258|8370|54145|64591|83740|126961|333932|474381|474382|554313|728137|728395|728403|100289087	TSPY1|HIST2H4A|H2BFS|TSPY2|H2AFB3|HIST2H3C|HIST2H3A|H2AFB2|H2AFB1|HIST2H4B|TSPY3|TSPY4|TSPY8|TSPY10	-1.6366454076187278	0	4	0	0	-8.764217040657035	37.348453608247425
1	-4.435263248067295	R-HSA-73728	M1	1	0	Reactome Gene Sets	6	RNA Polymerase I Promoter Opening	-4.435263248067295	6.323547700867288	6.05659957359103	24152	63	485	8	1.6494845360824741	0.5783511122298188	8337|8370|8932|126961|333932|474382|554313|723790	HIST2H2AA3|HIST2H4A|MBD2|HIST2H3C|HIST2H3A|H2AFB1|HIST2H4B|HIST2H2AA4	-1.6104029044747517	0	4	0	0	-8.764217040657035	37.348453608247425
1	-4.335444533057357	R-HSA-5334118	M1	1	0	Reactome Gene Sets	6	DNA methylation	-4.335444533057357	6.128977002379064	5.927381722378598	24152	65	485	8	1.6494845360824741	0.5783511122298188	8337|8370|29947|126961|333932|474382|554313|723790	HIST2H2AA3|HIST2H4A|DNMT3L|HIST2H3C|HIST2H3A|H2AFB1|HIST2H4B|HIST2H2AA4	-1.5521938408982785	0	4	0	0	-8.764217040657035	37.348453608247425
1	-3.8503449256183155	GO:0065004	M1	1	0	GO Biological Processes	19	protein-DNA complex assembly	-3.8503449256183155	3.0488533557752997	4.6142189631947055	24152	245	485	15	3.0927835051546393	0.7861075196071474	2966|7258|8370|54145|64591|83740|126961|333932|474381|474382|554313|728137|728395|728403|100289087	GTF2H2|TSPY1|HIST2H4A|H2BFS|TSPY2|H2AFB3|HIST2H3C|HIST2H3A|H2AFB2|H2AFB1|HIST2H4B|TSPY3|TSPY4|TSPY8|TSPY10	-1.11390648480831	0	4	0	0	-8.764217040657035	37.348453608247425
1	-3.508053057363292	R-HSA-427413	M1	1	0	Reactome Gene Sets	6	NoRC negatively regulates rRNA expression	-3.508053057363292	4.188611619616534	4.732034969554055	24152	107	485	9	1.8556701030927836	0.6127906401161416	2966|8337|8370|8932|126961|333932|474382|554313|723790	GTF2H2|HIST2H2AA3|HIST2H4A|MBD2|HIST2H3C|HIST2H3A|H2AFB1|HIST2H4B|HIST2H2AA4	-0.854417061113135	0	4	0	0	-8.764217040657035	37.348453608247425
1	-3.4481211519550365	R-HSA-73854	M1	1	0	Reactome Gene Sets	6	RNA Polymerase I Promoter Clearance	-3.4481211519550365	4.111756360541001	4.661131222304269	24152	109	485	9	1.8556701030927836	0.6127906401161416	2966|8337|8370|8932|126961|333932|474382|554313|723790	GTF2H2|HIST2H2AA3|HIST2H4A|MBD2|HIST2H3C|HIST2H3A|H2AFB1|HIST2H4B|HIST2H2AA4	-0.8049779040731879	0	4	0	0	-8.764217040657035	37.348453608247425
1	-3.4399587041244164	GO:0007498	M1	1	0	GO Biological Processes	19	mesoderm development	-3.4399587041244164	3.7442058755135252	4.542886349817289	24152	133	485	10	2.0618556701030926	0.6452591874443847	5457|6899|6939|7258|10220|64591|728137|728395|728403|100289087	POU4F1|TBX1|TCF15|TSPY1|GDF11|TSPY2|TSPY3|TSPY4|TSPY8|TSPY10	-0.8049779040731879	0	4	0	0	-8.764217040657035	37.348453608247425
1	-3.4308265284246486	GO:0006325	M1	1	0	GO Biological Processes	19	chromatin organization	-3.4308265284246486	1.941806393049342	3.8654805375839754	24152	795	485	31	6.391752577319588	1.1106984490797767	6294|6656|7258|8337|8370|8932|9085|9426|54145|59335|64591|83740|125997|126961|161882|203611|253175|284428|333932|345630|474381|474382|554313|653656|653657|723790|728137|728395|728403|729458|100289087	SAFB|SOX1|TSPY1|HIST2H2AA3|HIST2H4A|MBD2|CDY1|CDY2A|H2BFS|PRDM12|TSPY2|H2AFB3|MBD3L2|HIST2H3C|ZFPM1|CDY2B|CDY1B|MBD3L5|HIST2H3A|FBLL1|H2AFB2|H2AFB1|HIST2H4B|MBD3L4|MBD3L3|HIST2H2AA4|TSPY3|TSPY4|TSPY8|MBD3L2B|TSPY10	-0.8048005710263467	0	4	0	0	-8.764217040657035	37.348453608247425
1	-3.4186889999922756	R-HSA-5250941	M1	1	0	Reactome Gene Sets	6	Negative epigenetic regulation of rRNA expression	-3.4186889999922756	4.074376757263355	4.626312413297273	24152	110	485	9	1.8556701030927836	0.6127906401161416	2966|8337|8370|8932|126961|333932|474382|554313|723790	GTF2H2|HIST2H2AA3|HIST2H4A|MBD2|HIST2H3C|HIST2H3A|H2AFB1|HIST2H4B|HIST2H2AA4	-0.8027929713642827	0	4	0	0	-8.764217040657035	37.348453608247425
1	-3.411444832693162	R-HSA-5625886	M1	1	0	Reactome Gene Sets	6	Activated PKN1 stimulates transcription of AR (androgen receptor) regulated genes KLK2 and KLK3	-3.411444832693162	5.202769656870288	4.931357488854479	24152	67	485	7	1.443298969072165	0.5415647146850888	8337|8370|126961|333932|474382|554313|723790	HIST2H2AA3|HIST2H4A|HIST2H3C|HIST2H3A|H2AFB1|HIST2H4B|HIST2H2AA4	-0.8027929713642827	0	4	0	0	-8.764217040657035	37.348453608247425
1	-3.37173011616646	R-HSA-427359	M1	1	0	Reactome Gene Sets	6	SIRT1 negatively regulates rRNA expression	-3.37173011616646	5.126258338386901	4.877680897203323	24152	68	485	7	1.443298969072165	0.5415647146850888	8337|8370|126961|333932|474382|554313|723790	HIST2H2AA3|HIST2H4A|HIST2H3C|HIST2H3A|H2AFB1|HIST2H4B|HIST2H2AA4	-0.7928248407975989	0	4	0	0	-8.764217040657035	37.348453608247425
1	-3.360858851218214	R-HSA-73864	M1	1	0	Reactome Gene Sets	6	RNA Polymerase I Transcription	-3.360858851218214	4.001620029455081	4.557895011625152	24152	112	485	9	1.8556701030927836	0.6127906401161416	2966|8337|8370|8932|126961|333932|474382|554313|723790	GTF2H2|HIST2H2AA3|HIST2H4A|MBD2|HIST2H3C|HIST2H3A|H2AFB1|HIST2H4B|HIST2H2AA4	-0.7928248407975989	0	4	0	0	-8.764217040657035	37.348453608247425
1	-3.341501019799343	GO:0071103	M1	1	0	GO Biological Processes	19	DNA conformation change	-3.341501019799343	2.6295940934299615	4.086321119122412	24152	303	485	16	3.2989690721649483	0.811024184211587	2966|7258|8370|11044|54145|64591|83740|126961|333932|474381|474382|554313|728137|728395|728403|100289087	GTF2H2|TSPY1|HIST2H4A|TENT4A|H2BFS|TSPY2|H2AFB3|HIST2H3C|HIST2H3A|H2AFB2|H2AFB1|HIST2H4B|TSPY3|TSPY4|TSPY8|TSPY10	-0.7858613307977	0	4	0	0	-8.764217040657035	37.348453608247425
1	-3.3386553746615784	R-HSA-73777	M1	1	0	Reactome Gene Sets	6	RNA Polymerase I Chain Elongation	-3.3386553746615784	4.426483390607102	4.661984737031263	24152	90	485	8	1.6494845360824741	0.5783511122298188	2966|8337|8370|126961|333932|474382|554313|723790	GTF2H2|HIST2H2AA3|HIST2H4A|HIST2H3C|HIST2H3A|H2AFB1|HIST2H4B|HIST2H2AA4	-0.7858613307977	0	4	0	0	-8.764217040657035	37.348453608247425
1	-3.2163506651245943	GO:0071824	M1	1	0	GO Biological Processes	19	protein-DNA complex subunit organization	-3.2163506651245943	2.658252925853909	4.0025378607574575	24152	281	485	15	3.0927835051546393	0.7861075196071474	2966|7258|8370|54145|64591|83740|126961|333932|474381|474382|554313|728137|728395|728403|100289087	GTF2H2|TSPY1|HIST2H4A|H2BFS|TSPY2|H2AFB3|HIST2H3C|HIST2H3A|H2AFB2|H2AFB1|HIST2H4B|TSPY3|TSPY4|TSPY8|TSPY10	-0.6783042304144246	0	4	0	0	-8.764217040657035	37.348453608247425
1	-3.1835257112067477	R-HSA-212300	M1	1	0	Reactome Gene Sets	6	PRC2 methylates histones and DNA	-3.1835257112067477	4.77514475356588	4.6242641949662	24152	73	485	7	1.443298969072165	0.5415647146850888	8337|8370|126961|333932|474382|554313|723790	HIST2H2AA3|HIST2H4A|HIST2H3C|HIST2H3A|H2AFB1|HIST2H4B|HIST2H2AA4	-0.664169414426592	0	4	0	0	-8.764217040657035	37.348453608247425
1	-3.181050902399826	R-HSA-5625740	M1	1	0	Reactome Gene Sets	6	RHO GTPases activate PKNs	-3.181050902399826	4.19351058057515	4.464535193318005	24152	95	485	8	1.6494845360824741	0.5783511122298188	5170|8337|8370|126961|333932|474382|554313|723790	PDPK1|HIST2H2AA3|HIST2H4A|HIST2H3C|HIST2H3A|H2AFB1|HIST2H4B|HIST2H2AA4	-0.664169414426592	0	4	0	0	-8.764217040657035	37.348453608247425
1	-3.147819144920974	R-HSA-2299718	M1	1	0	Reactome Gene Sets	6	Condensation of Prophase Chromosomes	-3.147819144920974	4.710615770409585	4.576341904531629	24152	74	485	7	1.443298969072165	0.5415647146850888	8337|8370|126961|333932|474382|554313|723790	HIST2H2AA3|HIST2H4A|HIST2H3C|HIST2H3A|H2AFB1|HIST2H4B|HIST2H2AA4	-0.644510464137014	0	4	0	0	-8.764217040657035	37.348453608247425
1	-3.1209729609110597	R-HSA-8936459	M1	1	0	Reactome Gene Sets	6	RUNX1 regulates genes involved in megakaryocyte differentiation and platelet function	-3.1209729609110597	4.107046444893188	4.389325161802919	24152	97	485	8	1.6494845360824741	0.5783511122298188	8337|8370|126961|161882|333932|474382|554313|723790	HIST2H2AA3|HIST2H4A|HIST2H3C|ZFPM1|HIST2H3A|H2AFB1|HIST2H4B|HIST2H2AA4	-0.6242948590261128	0	4	0	0	-8.764217040657035	37.348453608247425
1	-3.0781958924509527	R-HSA-427389	M1	1	0	Reactome Gene Sets	6	ERCC6 (CSB) and EHMT2 (G9a) positively regulate rRNA expression	-3.0781958924509527	4.586652197504069	4.48302041192054	24152	76	485	7	1.443298969072165	0.5415647146850888	8337|8370|126961|333932|474382|554313|723790	HIST2H2AA3|HIST2H4A|HIST2H3C|HIST2H3A|H2AFB1|HIST2H4B|HIST2H2AA4	-0.5880486577249635	0	4	0	0	-8.764217040657035	37.348453608247425
1	-3.0531113034449717	R-HSA-212165	M1	1	0	Reactome Gene Sets	6	Epigenetic regulation of gene expression	-3.0531113034449717	3.3421434996194552	4.105260254964747	24152	149	485	10	2.0618556701030926	0.6452591874443847	2966|8337|8370|8932|29947|126961|333932|474382|554313|723790	GTF2H2|HIST2H2AA3|HIST2H4A|MBD2|DNMT3L|HIST2H3C|HIST2H3A|H2AFB1|HIST2H4B|HIST2H2AA4	-0.5819873060324129	0	4	0	0	-8.764217040657035	37.348453608247425
1	-2.9779948766692783	R-HSA-3214858	M1	1	0	Reactome Gene Sets	6	RMTs methylate histone arginines	-2.9779948766692783	4.412475531776066	4.348953926140834	24152	79	485	7	1.443298969072165	0.5415647146850888	8337|8370|126961|333932|474382|554313|723790	HIST2H2AA3|HIST2H4A|HIST2H3C|HIST2H3A|H2AFB1|HIST2H4B|HIST2H2AA4	-0.513031187961538	0	4	0	0	-8.764217040657035	37.348453608247425
1	-2.879160485637483	GO:0000183	M1	1	0	GO Biological Processes	19	chromatin silencing at rDNA	-2.879160485637483	6.072919285893889	4.653814753984592	24152	41	485	5	1.0309278350515463	0.45866226665571014	8370|8932|126961|333932|554313	HIST2H4A|MBD2|HIST2H3C|HIST2H3A|HIST2H4B	-0.4379997116023673	0	4	0	0	-8.764217040657035	37.348453608247425
1	-2.7916079749129223	R-HSA-1912422	M1	1	0	Reactome Gene Sets	6	Pre-NOTCH Expression and Processing	-2.7916079749129223	3.654894542703112	3.976793299706549	24152	109	485	8	1.6494845360824741	0.5783511122298188	3955|8337|8370|126961|333932|474382|554313|723790	LFNG|HIST2H2AA3|HIST2H4A|HIST2H3C|HIST2H3A|H2AFB1|HIST2H4B|HIST2H2AA4	-0.35619952976689806	0	4	0	0	-8.764217040657035	37.348453608247425
1	-2.7619743483881853	R-HSA-912446	M1	1	0	Reactome Gene Sets	6	Meiotic recombination	-2.7619743483881853	4.053320546631503	4.060565239540936	24152	86	485	7	1.443298969072165	0.5415647146850888	8337|8370|126961|333932|474382|554313|723790	HIST2H2AA3|HIST2H4A|HIST2H3C|HIST2H3A|H2AFB1|HIST2H4B|HIST2H2AA4	-0.3378469136518501	0	4	0	0	-8.764217040657035	37.348453608247425
1	-2.6306210537867467	R-HSA-68875	M1	1	0	Reactome Gene Sets	6	Mitotic Prophase	-2.6306210537867467	3.156207347175839	3.6889726601588166	24152	142	485	9	1.8556701030927836	0.6127906401161416	8337|8370|8615|55844|126961|333932|474382|554313|723790	HIST2H2AA3|HIST2H4A|USO1|PPP2R2D|HIST2H3C|HIST2H3A|H2AFB1|HIST2H4B|HIST2H2AA4	-0.2291718838107891	0	4	0	0	-8.764217040657035	37.348453608247425
1	-2.621114635175723	R-HSA-201722	M1	1	0	Reactome Gene Sets	6	Formation of the beta-catenin:TCF transactivating complex	-2.621114635175723	3.830610626486915	3.872672889014671	24152	91	485	7	1.443298969072165	0.5415647146850888	8337|8370|126961|333932|474382|554313|723790	HIST2H2AA3|HIST2H4A|HIST2H3C|HIST2H3A|H2AFB1|HIST2H4B|HIST2H2AA4	-0.2291718838107891	0	4	0	0	-8.764217040657035	37.348453608247425
1	-2.621114635175723	R-HSA-5250924	M1	1	0	Reactome Gene Sets	6	B-WICH complex positively regulates rRNA expression	-2.621114635175723	3.830610626486915	3.872672889014671	24152	91	485	7	1.443298969072165	0.5415647146850888	8337|8370|126961|333932|474382|554313|723790	HIST2H2AA3|HIST2H4A|HIST2H3C|HIST2H3A|H2AFB1|HIST2H4B|HIST2H2AA4	-0.2291718838107891	0	4	0	0	-8.764217040657035	37.348453608247425
1	-2.5675716705701035	R-HSA-1912408	M1	1	0	Reactome Gene Sets	6	Pre-NOTCH Transcription and Translation	-2.5675716705701035	3.748231903336659	3.8012189701701646	24152	93	485	7	1.443298969072165	0.5415647146850888	8337|8370|126961|333932|474382|554313|723790	HIST2H2AA3|HIST2H4A|HIST2H3C|HIST2H3A|H2AFB1|HIST2H4B|HIST2H2AA4	-0.19583230529345652	0	4	0	0	-8.764217040657035	37.348453608247425
1	-2.4460235259398795	hsa05034	M1	1	0	KEGG Pathway	24	Alcoholism	-2.4460235259398795	2.766552119129438	3.4054726442347603	24152	180	485	10	2.0618556701030926	0.6452591874443847	8337|8370|25759|83740|126961|333932|474381|474382|554313|723790	HIST2H2AA3|HIST2H4A|SHC2|H2AFB3|HIST2H3C|HIST2H3A|H2AFB2|H2AFB1|HIST2H4B|HIST2H2AA4	-0.09358931585861915	0	4	0	0	-8.764217040657035	37.348453608247425
1	-2.417283996252168	R-HSA-171306	M1	1	0	Reactome Gene Sets	6	Packaging Of Telomere Ends	-2.417283996252168	4.788263283108643	3.91471480328916	24152	52	485	5	1.0309278350515463	0.45866226665571014	8337|8370|474382|554313|723790	HIST2H2AA3|HIST2H4A|H2AFB1|HIST2H4B|HIST2H2AA4	-0.07556917885501113	0	4	0	0	-8.764217040657035	37.348453608247425
1	-2.289205429239266	GO:0045652	M1	1	0	GO Biological Processes	19	regulation of megakaryocyte differentiation	-2.289205429239266	3.782121884379486	3.5456136694340645	24152	79	485	6	1.2371134020618557	0.5019156922605331	8370|126961|161882|333932|338382|554313	HIST2H4A|HIST2H3C|ZFPM1|HIST2H3A|RAB7B|HIST2H4B	0.0	0	4	0	0	-8.764217040657035	37.348453608247425
1	-2.253249000805613	R-HSA-5250913	M1	1	0	Reactome Gene Sets	6	Positive epigenetic regulation of rRNA expression	-2.253249000805613	3.2885430850029174	3.380316981475132	24152	106	485	7	1.443298969072165	0.5415647146850888	8337|8370|126961|333932|474382|554313|723790	HIST2H2AA3|HIST2H4A|HIST2H3C|HIST2H3A|H2AFB1|HIST2H4B|HIST2H2AA4	0.0	0	4	0	0	-8.764217040657035	37.348453608247425
1	-2.253249000805613	R-HSA-5578749	M1	1	0	Reactome Gene Sets	6	Transcriptional regulation by small RNAs	-2.253249000805613	3.2885430850029174	3.380316981475132	24152	106	485	7	1.443298969072165	0.5415647146850888	8337|8370|126961|333932|474382|554313|723790	HIST2H2AA3|HIST2H4A|HIST2H3C|HIST2H3A|H2AFB1|HIST2H4B|HIST2H2AA4	0.0	0	4	0	0	-8.764217040657035	37.348453608247425
1	-2.188031709039877	R-HSA-977225	M1	1	0	Reactome Gene Sets	6	Amyloid fiber formation	-2.188031709039877	3.1980327248652225	3.2924553771088294	24152	109	485	7	1.443298969072165	0.5415647146850888	8337|8370|126961|333932|474382|554313|723790	HIST2H2AA3|HIST2H4A|HIST2H3C|HIST2H3A|H2AFB1|HIST2H4B|HIST2H2AA4	0.0	0	4	0	0	-8.764217040657035	37.348453608247425
1	-2.166835975079333	R-HSA-2559582	M1	1	0	Reactome Gene Sets	6	Senescence-Associated Secretory Phenotype (SASP)	-2.166835975079333	3.1689597000937204	3.2638436914989857	24152	110	485	7	1.443298969072165	0.5415647146850888	8337|8370|126961|333932|474382|554313|723790	HIST2H2AA3|HIST2H4A|HIST2H3C|HIST2H3A|H2AFB1|HIST2H4B|HIST2H2AA4	0.0	0	4	0	0	-8.764217040657035	37.348453608247425
1	-2.0577401672816467	R-HSA-1474165	M1	1	0	Reactome Gene Sets	6	Reproduction	-2.0577401672816467	2.7665521191294387	3.043662775200312	24152	144	485	8	1.6494845360824741	0.5783511122298188	49|8337|8370|126961|333932|474382|554313|723790	ACR|HIST2H2AA3|HIST2H4A|HIST2H3C|HIST2H3A|H2AFB1|HIST2H4B|HIST2H2AA4	0.0	0	4	0	0	-8.764217040657035	37.348453608247425
1	-2.006346556007346	R-HSA-1500620	M1	1	0	Reactome Gene Sets	6	Meiosis	-2.006346556007346	2.954114974663638	3.0461052905062345	24152	118	485	7	1.443298969072165	0.5415647146850888	8337|8370|126961|333932|474382|554313|723790	HIST2H2AA3|HIST2H4A|HIST2H3C|HIST2H3A|H2AFB1|HIST2H4B|HIST2H2AA4	0.0	0	4	0	0	-8.764217040657035	37.348453608247425
1	-8.290154834291249	GO:0007283	M1	1	0	GO Biological Processes	19	spermatogenesis	-8.290154834291249	3.135425735013364	7.18425580907528	24152	540	485	34	7.010309278350515	1.159351482116809	1617|7258|9083|9085|9426|10407|11077|26165|29947|30014|57054|57055|57135|64591|85376|150221|159163|203611|253175|378951|389730|389761|389762|440804|442867|442868|727830|727905|728137|728395|728403|728441|728712|100289087	DAZ1|TSPY1|BPY2|CDY1|CDY2A|SPAG11B|HSF2BP|SPATA31A7|DNMT3L|SPANXA1|DAZ3|DAZ2|DAZ4|TSPY2|RIMBP3|RIMBP3C|RBMY1F|CDY2B|CDY1B|RBMY1J|SPATA31A6|SPATA31D4|SPATA31D3|RIMBP3B|BPY2B|BPY2C|SPATA31A3|SPATA31A5|TSPY3|TSPY4|TSPY8|GGT2|SPANXA2|TSPY10	-4.81903083687869	0	5	1	1	-8.290154834291249	3.135425735013364
1	-7.935584436694914	GO:0048232	M1	1	0	GO Biological Processes	19	male gamete generation	-7.935584436694914	3.0342829693677715	6.959763756386511	24152	558	485	34	7.010309278350515	1.159351482116809	1617|7258|9083|9085|9426|10407|11077|26165|29947|30014|57054|57055|57135|64591|85376|150221|159163|203611|253175|378951|389730|389761|389762|440804|442867|442868|727830|727905|728137|728395|728403|728441|728712|100289087	DAZ1|TSPY1|BPY2|CDY1|CDY2A|SPAG11B|HSF2BP|SPATA31A7|DNMT3L|SPANXA1|DAZ3|DAZ2|DAZ4|TSPY2|RIMBP3|RIMBP3C|RBMY1F|CDY2B|CDY1B|RBMY1J|SPATA31A6|SPATA31D4|SPATA31D3|RIMBP3B|BPY2B|BPY2C|SPATA31A3|SPATA31A5|TSPY3|TSPY4|TSPY8|GGT2|SPANXA2|TSPY10	-4.5736049087074235	0	5	0	0	-8.290154834291249	3.135425735013364
1	-6.20393694997132	GO:0007276	M1	1	0	GO Biological Processes	19	gamete generation	-6.20393694997132	2.5223268235188807	5.812199149285786	24152	691	485	35	7.216494845360825	1.1749724161561237	1617|7258|9083|9085|9426|10407|11077|26165|29947|30014|54361|57054|57055|57135|64591|85376|150221|159163|203611|253175|378951|389730|389761|389762|440804|442867|442868|727830|727905|728137|728395|728403|728441|728712|100289087	DAZ1|TSPY1|BPY2|CDY1|CDY2A|SPAG11B|HSF2BP|SPATA31A7|DNMT3L|SPANXA1|WNT4|DAZ3|DAZ2|DAZ4|TSPY2|RIMBP3|RIMBP3C|RBMY1F|CDY2B|CDY1B|RBMY1J|SPATA31A6|SPATA31D4|SPATA31D3|RIMBP3B|BPY2B|BPY2C|SPATA31A3|SPATA31A5|TSPY3|TSPY4|TSPY8|GGT2|SPANXA2|TSPY10	-3.1088164195481194	0	5	0	0	-8.290154834291249	3.135425735013364
1	-7.567700605459437	GO:0051225	M1	1	0	GO Biological Processes	19	spindle assembly	-7.567700605459437	6.07291928589389	8.074385536329254	24152	123	485	15	3.0927835051546393	0.7861075196071474	3303|3304|23015|55889|283768|342096|440270|643699|653073|653075|653125|653641|653643|728047|101059918	HSPA1A|HSPA1B|GOLGA8A|GOLGA6B|GOLGA8G|GOLGA6A|GOLGA8B|GOLGA8N|GOLGA8J|GOLGA8T|GOLGA8K|GOLGA6C|GOLGA6D|GOLGA8O|GOLGA8R	-4.2675878433140975	0	6	1	1	-7.567700605459437	6.07291928589389
1	-6.649628150476861	GO:0007030	M1	1	0	GO Biological Processes	19	Golgi organization	-6.649628150476861	5.187285223367698	7.21443993953102	24152	144	485	15	3.0927835051546393	0.7861075196071474	8615|9659|23015|55889|283768|342096|440270|643699|653073|653075|653125|653641|653643|728047|101059918	USO1|PDE4DIP|GOLGA8A|GOLGA6B|GOLGA8G|GOLGA6A|GOLGA8B|GOLGA8N|GOLGA8J|GOLGA8T|GOLGA8K|GOLGA6C|GOLGA6D|GOLGA8O|GOLGA8R	-3.4336547034461415	0	6	0	0	-7.567700605459437	6.07291928589389
1	-5.268545400876878	GO:0007051	M1	1	0	GO Biological Processes	19	spindle organization	-5.268545400876878	4.037670660351073	5.9372663984200305	24152	185	485	15	3.0927835051546393	0.7861075196071474	3303|3304|23015|55889|283768|342096|440270|643699|653073|653075|653125|653641|653643|728047|101059918	HSPA1A|HSPA1B|GOLGA8A|GOLGA6B|GOLGA8G|GOLGA6A|GOLGA8B|GOLGA8N|GOLGA8J|GOLGA8T|GOLGA8K|GOLGA6C|GOLGA6D|GOLGA8O|GOLGA8R	-2.2947460442722685	0	6	0	0	-7.567700605459437	6.07291928589389
1	-2.2024166863819112	GO:0010256	M1	1	0	GO Biological Processes	19	endomembrane system organization	-2.2024166863819112	1.9779554870411409	2.9222262485817376	24152	428	485	17	3.5051546391752577	0.8350928769545299	8615|9659|23015|55889|283768|342096|440270|643699|653073|653075|653125|653145|653641|653643|728047|728113|101059918	USO1|PDE4DIP|GOLGA8A|GOLGA6B|GOLGA8G|GOLGA6A|GOLGA8B|GOLGA8N|GOLGA8J|GOLGA8T|GOLGA8K|ANXA8|GOLGA6C|GOLGA6D|GOLGA8O|ANXA8L1|GOLGA8R	0.0	0	6	0	0	-7.567700605459437	6.07291928589389
1	-6.630742748653704	GO:0006607	M1	1	0	GO Biological Processes	19	NLS-bearing protein import into nucleus	-6.630742748653704	15.155894217839533	9.722957508992232	24152	23	485	7	1.443298969072165	0.5415647146850888	84220|285190|400966|653489|727851|729540|729857	RGPD5|RGPD4|RGPD1|RGPD3|RGPD8|RGPD6|RGPD2	-3.4336547034461415	0	7	1	1	-6.630742748653704	15.155894217839533
1	-4.351698775286831	hsa03013	M1	1	0	KEGG Pathway	24	RNA transport	-4.351698775286831	3.7858081630192317	5.2333820460797495	24152	171	485	13	2.6804123711340204	0.7333816978282389	6606|6607|8663|56001|84220|285190|340529|400966|645974|653489|727851|728689|729857	SMN1|SMN2|EIF3C|NXF2|RGPD5|RGPD4|PABPC1L2A|RGPD1|PABPC1L2B|RGPD3|RGPD8|EIF3CL|RGPD2	-1.5521938408982785	0	7	0	0	-6.630742748653704	15.155894217839533
1	-2.414067610992979	GO:0051170	M1	1	0	GO Biological Processes	19	import into nucleus	-2.414067610992979	2.9292904790782295	3.426995913110786	24152	153	485	9	1.8556701030927836	0.6127906401161416	6606|6607|84220|285190|400966|653489|727851|729540|729857	SMN1|SMN2|RGPD5|RGPD4|RGPD1|RGPD3|RGPD8|RGPD6|RGPD2	-0.07556917885501113	0	7	0	0	-6.630742748653704	15.155894217839533
1	-4.982808373290839	GO:0006346	M1	1	0	GO Biological Processes	19	methylation-dependent chromatin silencing	-4.982808373290839	11.491831879460745	7.662353038537683	24152	26	485	6	1.2371134020618557	0.5019156922605331	8932|125997|284428|653656|653657|729458	MBD2|MBD3L2|MBD3L5|MBD3L4|MBD3L3|MBD3L2B	-2.046797577575629	0	8	1	1	-4.982808373290839	11.491831879460745
1	-3.773462273104883	GO:0006342	M1	1	0	GO Biological Processes	19	chromatin silencing	-3.773462273104883	4.115532078043792	4.918195787531018	24152	121	485	10	2.0618556701030926	0.6452591874443847	8370|8932|125997|126961|284428|333932|554313|653656|653657|729458	HIST2H4A|MBD2|MBD3L2|HIST2H3C|MBD3L5|HIST2H3A|HIST2H4B|MBD3L4|MBD3L3|MBD3L2B	-1.0593002270060299	0	8	0	0	-4.982808373290839	11.491831879460745
1	-3.3627785905112852	GO:0045814	M1	1	0	GO Biological Processes	19	negative regulation of gene expression, epigenetic	-3.3627785905112852	3.6616130988477855	4.455853101770917	24152	136	485	10	2.0618556701030926	0.6452591874443847	8370|8932|125997|126961|284428|333932|554313|653656|653657|729458	HIST2H4A|MBD2|MBD3L2|HIST2H3C|MBD3L5|HIST2H3A|HIST2H4B|MBD3L4|MBD3L3|MBD3L2B	-0.7928248407975989	0	8	0	0	-4.982808373290839	11.491831879460745
1	-4.670034220257186	GO:0090630	M1	1	0	GO Biological Processes	19	activation of GTPase activity	-4.670034220257186	5.241888225718935	5.930169571078337	24152	95	485	10	2.0618556701030926	0.6452591874443847	84218|414059|414060|729873|729877|101060321|101060351|101060389|102723859|102724862	TBC1D3F|TBC1D3B|TBC1D3C|TBC1D3|TBC1D3H|TBC1D3G|TBC1D3K|TBC1D3D|TBC1D3E|TBC1D3I	-1.7851759469893578	0	9	1	1	-4.670034220257186	5.241888225718935
1	-3.6735778463166606	GO:0043547	M1	1	0	GO Biological Processes	19	positive regulation of GTPase activity	-3.6735778463166606	2.4713616945076864	4.263989510140594	24152	403	485	20	4.123711340206185	0.9028775747897915	7984|54361|84218|84220|116988|285190|400966|414059|414060|653489|727851|729540|729857|729873|729877|101060321|101060351|101060389|102723859|102724862	ARHGEF5|WNT4|TBC1D3F|RGPD5|AGAP3|RGPD4|RGPD1|TBC1D3B|TBC1D3C|RGPD3|RGPD8|RGPD6|RGPD2|TBC1D3|TBC1D3H|TBC1D3G|TBC1D3K|TBC1D3D|TBC1D3E|TBC1D3I	-0.9806050992877455	0	9	0	0	-4.670034220257186	5.241888225718935
1	-2.7762350167936565	GO:0043087	M1	1	0	GO Biological Processes	19	regulation of GTPase activity	-2.7762350167936565	2.092350342198735	3.445704917166362	24152	476	485	20	4.123711340206185	0.9028775747897915	7984|54361|84218|84220|116988|285190|400966|414059|414060|653489|727851|729540|729857|729873|729877|101060321|101060351|101060389|102723859|102724862	ARHGEF5|WNT4|TBC1D3F|RGPD5|AGAP3|RGPD4|RGPD1|TBC1D3B|TBC1D3C|RGPD3|RGPD8|RGPD6|RGPD2|TBC1D3|TBC1D3H|TBC1D3G|TBC1D3K|TBC1D3D|TBC1D3E|TBC1D3I	-0.3465037045393227	0	9	0	0	-4.670034220257186	5.241888225718935
1	-4.513693512485669	GO:0061408	M1	1	0	GO Biological Processes	19	positive regulation of transcription from RNA polymerase II promoter in response to heat stress	-4.513693512485669	19.919175257731958	8.566085411588354	24152	10	485	4	0.8247422680412371	0.4106671137808488	86614|159119|100130086|100506164	HSFY1|HSFY2|HSFX2|HSFX1	-1.6446295064010725	0	10	1	1	-4.513693512485669	19.919175257731958
1	-2.382606836099876	GO:0036003	M1	1	0	GO Biological Processes	19	positive regulation of transcription from RNA polymerase II promoter in response to stress	-2.382606836099876	6.03611371446423	4.1441901283650395	24152	33	485	4	0.8247422680412371	0.4106671137808488	86614|159119|100130086|100506164	HSFY1|HSFY2|HSFX2|HSFX1	-0.053156532939305244	0	10	0	0	-4.513693512485669	19.919175257731958
1	-4.3243478339748185	R-HSA-189085	M1	1	0	Reactome Gene Sets	6	Digestion of dietary carbohydrate	-4.3243478339748185	18.10834114339269	8.124440061778484	24152	11	485	4	0.8247422680412371	0.4106671137808488	276|277|278|279	AMY1A|AMY1B|AMY1C|AMY2A	-1.5521938408982785	0	11	1	1	-4.3243478339748185	18.10834114339269
1	-3.054778194738766	R-HSA-8935690	M1	1	0	Reactome Gene Sets	6	Digestion	-3.054778194738766	9.054170571696345	5.410287267027296	24152	22	485	4	0.8247422680412371	0.4106671137808488	276|277|278|279	AMY1A|AMY1B|AMY1C|AMY2A	-0.5819873060324129	0	11	0	0	-4.3243478339748185	18.10834114339269
1	-2.7091297091846065	R-HSA-8963743	M1	1	0	Reactome Gene Sets	6	Digestion and absorption	-2.7091297091846065	7.377472317678503	4.746392248995374	24152	27	485	4	0.8247422680412371	0.4106671137808488	276|277|278|279	AMY1A|AMY1B|AMY1C|AMY2A	-0.2959976587497345	0	11	0	0	-4.3243478339748185	18.10834114339269
1	-2.2448909009565843	hsa00500	M1	1	0	KEGG Pathway	24	Starch and sucrose metabolism	-2.2448909009565843	5.533104238258877	3.896378528012172	24152	36	485	4	0.8247422680412371	0.4106671137808488	276|277|278|279	AMY1A|AMY1B|AMY1C|AMY2A	0.0	0	11	0	0	-4.3243478339748185	18.10834114339269
1	-4.197215663392131	GO:0070935	M1	1	0	GO Biological Processes	19	3'-UTR-mediated mRNA stabilization	-4.197215663392131	11.317713214620428	6.930793423480125	24152	22	485	5	1.0309278350515463	0.45866226665571014	1617|11044|57054|57055|57135	DAZ1|TENT4A|DAZ3|DAZ2|DAZ4	-1.437296126732603	0	12	1	1	-4.197215663392131	11.317713214620428
1	-2.6953806957847206	GO:0048255	M1	1	0	GO Biological Processes	19	mRNA stabilization	-2.6953806957847206	5.533104238258876	4.3570967292326195	24152	45	485	5	1.0309278350515463	0.45866226665571014	1617|11044|57054|57055|57135	DAZ1|TENT4A|DAZ3|DAZ2|DAZ4	-0.28764367723655476	0	12	0	0	-4.197215663392131	11.317713214620428
1	-2.591603655592857	GO:1903311	M1	1	0	GO Biological Processes	19	regulation of mRNA metabolic process	-2.591603655592857	2.298366375892149	3.3734251692007993	24152	325	485	15	3.0927835051546393	0.7861075196071474	984|1617|3303|5940|6294|8570|9667|11044|57054|57055|57135|159163|378951|399664|728642	CDK11B|DAZ1|HSPA1A|RBMY1A1|SAFB|KHSRP|SAFB2|TENT4A|DAZ3|DAZ2|DAZ4|RBMY1F|RBMY1J|MEX3D|CDK11A	-0.21490087078465994	0	12	0	0	-4.197215663392131	11.317713214620428
1	-2.536167081895052	GO:0045948	M1	1	0	GO Biological Processes	19	positive regulation of translational initiation	-2.536167081895052	6.639725085910653	4.424648016849077	24152	30	485	4	0.8247422680412371	0.4106671137808488	1617|57054|57055|57135	DAZ1|DAZ3|DAZ2|DAZ4	-0.16933505111314906	0	12	0	0	-4.197215663392131	11.317713214620428
1	-2.491816012338206	GO:0043489	M1	1	0	GO Biological Processes	19	RNA stabilization	-2.491816012338206	4.9797938144329885	4.032606600834163	24152	50	485	5	1.0309278350515463	0.45866226665571014	1617|11044|57054|57055|57135	DAZ1|TENT4A|DAZ3|DAZ2|DAZ4	-0.12983648435071524	0	12	0	0	-4.197215663392131	11.317713214620428
1	-2.417283996252168	GO:1902373	M1	1	0	GO Biological Processes	19	negative regulation of mRNA catabolic process	-2.417283996252168	4.788263283108643	3.91471480328916	24152	52	485	5	1.0309278350515463	0.45866226665571014	1617|11044|57054|57055|57135	DAZ1|TENT4A|DAZ3|DAZ2|DAZ4	-0.07556917885501113	0	12	0	0	-4.197215663392131	11.317713214620428
1	-2.182086950376018	GO:1902369	M1	1	0	GO Biological Processes	19	negative regulation of RNA catabolic process	-2.182086950376018	4.220164249519482	3.5450748768486666	24152	59	485	5	1.0309278350515463	0.45866226665571014	1617|11044|57054|57055|57135	DAZ1|TENT4A|DAZ3|DAZ2|DAZ4	0.0	0	12	0	0	-4.197215663392131	11.317713214620428
1	-3.8027910070400854	GO:0042026	M1	1	0	GO Biological Processes	19	protein refolding	-3.8027910070400854	7.287503143072668	5.768054495627575	24152	41	485	6	1.2371134020618557	0.5019156922605331	1409|3303|3304|653598|728945|730262	CRYAA|HSPA1A|HSPA1B|PPIAL4C|PPIAL4F|PPIAL4E	-1.077633576639769	0	13	1	1	-3.8027910070400854	7.287503143072668
1	-3.735478748269447	GO:0018298	M1	1	0	GO Biological Processes	19	protein-chromophore linkage	-3.735478748269447	13.279450171821306	6.810041027131599	24152	15	485	4	0.8247422680412371	0.4106671137808488	2652|5956|728458|101060233	OPN1MW|OPN1LW|OPN1MW2|OPN1MW3	-1.0320405675623667	0	14	1	1	-3.735478748269447	18.674226804123712
1	-3.3787699211116546	R-HSA-2187335	M1	1	0	Reactome Gene Sets	6	The retinoid cycle in cones (daylight vision)	-3.3787699211116546	18.674226804123712	7.157273759542554	24152	8	485	3	0.6185567010309279	0.35601765770729216	2652|728458|101060233	OPN1MW|OPN1MW2|OPN1MW3	-0.7928248407975989	0	14	0	0	-3.735478748269447	18.674226804123712
1	-3.0608056574900555	R-HSA-419771	M1	1	0	Reactome Gene Sets	6	Opsins	-3.0608056574900555	14.93938144329897	6.311370892301949	24152	10	485	3	0.6185567010309279	0.35601765770729216	2652|728458|101060233	OPN1MW|OPN1MW2|OPN1MW3	-0.5819873060324129	0	14	0	0	-3.735478748269447	18.674226804123712
1	-2.6048639287356385	R-HSA-2453864	M1	1	0	Reactome Gene Sets	6	Retinoid cycle disease events	-2.6048639287356385	10.67098674521355	5.1814461301554475	24152	14	485	3	0.6185567010309279	0.35601765770729216	2652|728458|101060233	OPN1MW|OPN1MW2|OPN1MW3	-0.2231403425523906	0	14	0	0	-3.735478748269447	18.674226804123712
1	-2.6048639287356385	R-HSA-2474795	M1	1	0	Reactome Gene Sets	6	Diseases associated with visual transduction	-2.6048639287356385	10.67098674521355	5.1814461301554475	24152	14	485	3	0.6185567010309279	0.35601765770729216	2652|728458|101060233	OPN1MW|OPN1MW2|OPN1MW3	-0.2231403425523906	0	14	0	0	-3.735478748269447	18.674226804123712
1	-2.081407713309581	GO:0032467	M1	1	0	GO Biological Processes	19	positive regulation of cytokinesis	-2.081407713309581	4.979793814432989	3.606124975346801	24152	40	485	4	0.8247422680412371	0.4106671137808488	2652|5956|79541|728458	OPN1MW|OPN1LW|OR2A4|OPN1MW2	0.0	0	14	0	0	-3.735478748269447	18.674226804123712
1	-3.5078812668583765	R-HSA-5083625	M1	1	0	Reactome Gene Sets	6	Defective GALNT3 causes familial hyperphosphatemic tumoral calcinosis (HFTC)	-3.5078812668583765	11.717161916312918	6.3277224861181605	24152	17	485	4	0.8247422680412371	0.4106671137808488	4584|4586|10071|200958	MUC3A|MUC5AC|MUC12|MUC20	-0.854417061113135	0	15	1	1	-3.5078812668583765	11.717161916312918
1	-3.5078812668583765	R-HSA-5083632	M1	1	0	Reactome Gene Sets	6	Defective C1GALT1C1 causes Tn polyagglutination syndrome (TNPS)	-3.5078812668583765	11.717161916312918	6.3277224861181605	24152	17	485	4	0.8247422680412371	0.4106671137808488	4584|4586|10071|200958	MUC3A|MUC5AC|MUC12|MUC20	-0.854417061113135	0	15	0	0	-3.5078812668583765	11.717161916312918
1	-3.5078812668583765	R-HSA-5083636	M1	1	0	Reactome Gene Sets	6	Defective GALNT12 causes colorectal cancer 1 (CRCS1)	-3.5078812668583765	11.717161916312918	6.3277224861181605	24152	17	485	4	0.8247422680412371	0.4106671137808488	4584|4586|10071|200958	MUC3A|MUC5AC|MUC12|MUC20	-0.854417061113135	0	15	0	0	-3.5078812668583765	11.717161916312918
1	-3.1497287453804566	M5880	M1	1	0	Canonical Pathways	11	NABA ECM AFFILIATED	-3.1497287453804566	3.20337613793935	4.139233014722388	24152	171	485	11	2.268041237113402	0.6760407976740604	4584|4586|9672|10071|154790|200958|283971|284194|348174|653145|728113	MUC3A|MUC5AC|SDC3|MUC12|CLEC2L|MUC20|CLEC18C|LGALS9B|CLEC18A|ANXA8|ANXA8L1	-0.644510464137014	0	15	0	0	-3.5078812668583765	11.717161916312918
1	-2.9064029594549385	R-HSA-977068	M1	1	0	Reactome Gene Sets	6	Termination of O-glycan biosynthesis	-2.9064029594549385	8.299656357388317	5.121700716666453	24152	24	485	4	0.8247422680412371	0.4106671137808488	4584|4586|10071|200958	MUC3A|MUC5AC|MUC12|MUC20	-0.4594126417590991	0	15	0	0	-3.5078812668583765	11.717161916312918
1	-2.7091297091846065	R-HSA-5621480	M1	1	0	Reactome Gene Sets	6	Dectin-2 family	-2.7091297091846065	7.377472317678503	4.746392248995374	24152	27	485	4	0.8247422680412371	0.4106671137808488	4584|4586|10071|200958	MUC3A|MUC5AC|MUC12|MUC20	-0.2959976587497345	0	15	0	0	-3.5078812668583765	11.717161916312918
1	-2.1647142261657843	R-HSA-3781865	M1	1	0	Reactome Gene Sets	6	Diseases of glycosylation	-2.1647142261657843	2.886836993874197	3.182060961056559	24152	138	485	8	1.6494845360824741	0.5783511122298188	176|3955|4584|4586|9672|10071|126792|200958	ACAN|LFNG|MUC3A|MUC5AC|SDC3|MUC12|B3GALT6|MUC20	0.0	0	15	0	0	-3.5078812668583765	11.717161916312918
1	-3.3787699211116546	GO:0019344	M1	1	0	GO Biological Processes	19	cysteine biosynthetic process	-3.3787699211116546	18.674226804123712	7.157273759542554	24152	8	485	3	0.6185567010309279	0.35601765770729216	875|728441|102724560	CBS|GGT2|CBSL	-0.7928248407975989	0	16	1	1	-3.3787699211116546	18.674226804123712
1	-2.0873169073162363	GO:0000097	M1	1	0	GO Biological Processes	19	sulfur amino acid biosynthetic process	-2.0873169073162363	7.1139911634757	4.01248680386437	24152	21	485	3	0.6185567010309279	0.35601765770729216	875|728441|102724560	CBS|GGT2|CBSL	0.0	0	16	0	0	-3.3787699211116546	18.674226804123712
1	-2.0873169073162363	GO:0009070	M1	1	0	GO Biological Processes	19	serine family amino acid biosynthetic process	-2.0873169073162363	7.1139911634757	4.01248680386437	24152	21	485	3	0.6185567010309279	0.35601765770729216	875|728441|102724560	CBS|GGT2|CBSL	0.0	0	16	0	0	-3.3787699211116546	18.674226804123712
1	-3.209196432830473	GO:1900004	M1	1	0	GO Biological Processes	19	negative regulation of serine-type endopeptidase activity	-3.209196432830473	16.599312714776634	6.700356720494793	24152	9	485	3	0.6185567010309279	0.35601765770729216	1378|653145|728113	CR1|ANXA8|ANXA8L1	-0.6783042304144246	0	17	1	1	-3.209196432830473	16.599312714776634
1	-3.209196432830473	GO:1902572	M1	1	0	GO Biological Processes	19	negative regulation of serine-type peptidase activity	-3.209196432830473	16.599312714776634	6.700356720494793	24152	9	485	3	0.6185567010309279	0.35601765770729216	1378|653145|728113	CR1|ANXA8|ANXA8L1	-0.6783042304144246	0	17	0	0	-3.209196432830473	16.599312714776634
1	-2.9290075344335347	GO:1900003	M1	1	0	GO Biological Processes	19	regulation of serine-type endopeptidase activity	-2.9290075344335347	13.581255857544518	5.974609593051983	24152	11	485	3	0.6185567010309279	0.35601765770729216	1378|653145|728113	CR1|ANXA8|ANXA8L1	-0.4761083571271749	0	17	0	0	-3.209196432830473	16.599312714776634
1	-2.9290075344335347	GO:1902571	M1	1	0	GO Biological Processes	19	regulation of serine-type peptidase activity	-2.9290075344335347	13.581255857544518	5.974609593051983	24152	11	485	3	0.6185567010309279	0.35601765770729216	1378|653145|728113	CR1|ANXA8|ANXA8L1	-0.4761083571271749	0	17	0	0	-3.209196432830473	16.599312714776634
1	-2.382606836099876	GO:0021884	M1	1	0	GO Biological Processes	19	forebrain neuron development	-2.382606836099876	6.03611371446423	4.1441901283650395	24152	33	485	4	0.8247422680412371	0.4106671137808488	5881|6656|27164|170302	RAC3|SOX1|SALL3|ARX	-0.053156532939305244	0	18	1	1	-2.382606836099876	6.03611371446423
1	-2.2783662181067887	GO:0021879	M1	1	0	GO Biological Processes	19	forebrain neuron differentiation	-2.2783662181067887	4.4462444771723115	3.6960211031631367	24152	56	485	5	1.0309278350515463	0.45866226665571014	5881|6656|27164|85358|170302	RAC3|SOX1|SALL3|SHANK3|ARX	0.0	0	18	0	0	-2.382606836099876	6.03611371446423
1	-2.2783662181067887	hsa05150	M1	1	0	KEGG Pathway	24	Staphylococcus aureus infection	-2.2783662181067887	4.4462444771723115	3.6960211031631367	24152	56	485	5	1.0309278350515463	0.45866226665571014	720|721|2213|3123|3127	C4A|C4B|FCGR2B|HLA-DRB1|HLA-DRB5	0.0	0	19	1	1	-2.2783662181067887	4.4462444771723115
